# Supplementary material
Source: ML conference proceedings conference paper supplement (https://openaccess.thecvf.com/content/ICCV_2019/html/Kasten_Algebraic_Characterization_of_ICCV_2019_paper.html)
Supplement: Supplementary file 1 [file Kasten_Algebraic_Characterization_of_ICCV_2019_supplemental.zip]

Archive with 11 entries (10 files):
- 1621_supp.pdf
- code/
- code/counterExample.m
- code/counter_data.mat
- code/getCrossM.m
- code/getRandomRotation.m
- code/isEigenBlockRot.m
- code/isLoopClosed.m
- code/makeSign.m
- code/README.txt
- code/realE.m
