# Supplementary material
Source: ML conference proceedings conference paper supplement (https://openaccess.thecvf.com/content/ICCV_2019/html/Kasten_Algebraic_Characterization_of_ICCV_2019_paper.html)
Supplement: Supplementary file 1 [file Kasten_Algebraic_Characterization_of_ICCV_2019_supplemental.zip › code/getCrossM.m]

function [ res ] = getCrossM( v )
%GETCROSSM Summary of this function goes here
%   Detailed explanation goes here
t1=cross(v,[1;0;0]);
t2=cross(v,[0;1;0]);
t3=cross(v,[0;0;1]);

res=[t1 t2 t3];
end
