# Supplementary material
Source: ML conference proceedings conference paper supplement (https://openaccess.thecvf.com/content/ICCV_2019/html/Kasten_Algebraic_Characterization_of_ICCV_2019_paper.html)
Supplement: Supplementary file 1 [file Kasten_Algebraic_Characterization_of_ICCV_2019_supplemental.zip › code/getRandomRotation.m]

function [ A ] = getRandomRotation(  )
%GETRANDOMROTATION Summary of this function goes here
%   Detailed explanation goes here

A=rand(3);
[u,d,v]=svd(A);

A=u*v';
if det(A)==-1
    A=-A;
end
end
