# Supplementary material
Source: ML conference proceedings conference paper supplement (https://openaccess.thecvf.com/content/ICCV_2019/html/Kasten_Algebraic_Characterization_of_ICCV_2019_paper.html)
Supplement: Supplementary file 1 [file Kasten_Algebraic_Characterization_of_ICCV_2019_supplemental.zip › code/isEigenBlockRot.m]

function  isEigenBlockRot( E )
%ISEIGENBLOCKROT Summary of this function goes here
%   Detailed explanation goes here

[U,D]=eig(E);
[~,order]=sort(diag(D));
U=U(:,order);
X=real(U(:,1:3));
Y=real(U(:,9:-1:7));
disp('If E is consistent, one of the following should return scaled identity matrices:')
for i=[-1 1]
    for j=[-1 1]
        for k=[-1 1]
            disp('-----------------------------------------------------------------------')
            Is=diag([i,j,k]);
            curV=1/sqrt(2)*(X+Y*Is);
            curV(1:3,1:3)*curV(1:3,1:3)'
            curV(4:6,1:3)*curV(4:6,1:3)'
            curV(7:9,1:3)*curV(7:9,1:3)'
            disp('-----------------------------------------------------------------------')
        end
    end
end
end
