# Supplementary material
Source: ML conference proceedings conference paper supplement (https://openaccess.thecvf.com/content/ICCV_2019/html/Kasten_Algebraic_Characterization_of_ICCV_2019_paper.html)
Supplement: Supplementary file 1 [file Kasten_Algebraic_Characterization_of_ICCV_2019_supplemental.zip › code/makeSign.m]

function [ R ] = makeSign( R )
%MAKESIGN Summary of this function goes here
%   Detailed explanation goes here
if det(R)<0
R=-R;
end

end
