# Supplementary material
Source: ML conference proceedings conference paper supplement (https://openaccess.thecvf.com/content/ICCV_2019/html/Kasten_Algebraic_Characterization_of_ICCV_2019_paper.html)
Supplement: Supplementary file 1 [file Kasten_Algebraic_Characterization_of_ICCV_2019_supplemental.zip › code/README.txt]

The high level details of the counter example can be found in the pdf file. 

Details about the scripts:
counterExample.m - a script that generates the counter example and outputs:
	1. All the possible choices of (R_12)(R_23)(R_31). Non of the choices gives an identity matrix
	2. All possible choises of the blocks of (0.5)^0.5 (X+Y), where X+Y are the eigen vectors of the multiview matrix E. Non of them is block rotation matrix.

	

realE.m - a script that generates a random consistent example and outputs:
	1. All the possible choices of (R_12)(R_23)(R_31). One of the choices gives an identity matrix
	2. All possible choises of the blocks of (0.5)^0.5 (X+Y), where X+Y are the eigen vectors of the multiview matrix E. One of them is a block rotation matrix multiplied by sqrt(3).
