# Supplementary material
Source: ML conference proceedings conference paper supplement (https://openaccess.thecvf.com/content/ICCV_2019/html/Kasten_Algebraic_Characterization_of_ICCV_2019_paper.html)
Supplement: Supplementary file 1 [file Kasten_Algebraic_Characterization_of_ICCV_2019_supplemental.zip › code/realE.m]

clear
R1= getRandomRotation(  );
R2= getRandomRotation(  );
R3= getRandomRotation(  );

t1=rand(3,1);
t2=rand(3,1);
t3=rand(3,1);

V=[R1';R2';R3'];
U=[R1'*getCrossM(t1);R2'*getCrossM(t2);R3'*getCrossM(t3)];

F=V*U'+U*V';

 isEigenBlockRot( F )

 
 isLoopClosed( F )
